# Supplementary material for: Enhanced photo-response performance of Cu2O-based graded heterojunction optoelectronic devices with a Ga2O3 buffer layer
Source: Royal Society of Chemistry journal article supplement (doi:10.1039/d2tc00652a), 2022-01-01
Supplement: d2tc00652a1.pdf [file d2tc00652a1.pdf]

Supplementary Materials for

**Enhanced photo-response performance of Cu<sub>2</sub>O-based graded heterojunction optoelectronic devices with Ga<sub>2</sub>O<sub>3</sub> buffer layer**

Meng Xiao<sup>1,2</sup>, Kailian Dong<sup>1,2</sup>, Jiwei Liang<sup>1,2</sup>, Jin He<sup>1\*</sup> and Guojia Fang<sup>1,2\*</sup>

<sup>1</sup> Key Lab of Artificial Micro- and Nano-Structures of Ministry of Education of China, School of Physics and Technology, Wuhan University, Wuhan 430072, Hubei, China

<sup>2</sup> Shenzhen Institute, Wuhan University, Shenzhen 518055, Guangdong, China

**\*Corresponding authors.**

E-mail addresses:

[gjfang@whu.edu.cn](mailto:gjfang@whu.edu.cn) (G.J. Fang), [jin.he@whu.edu.cn](mailto:jin.he@whu.edu.cn)

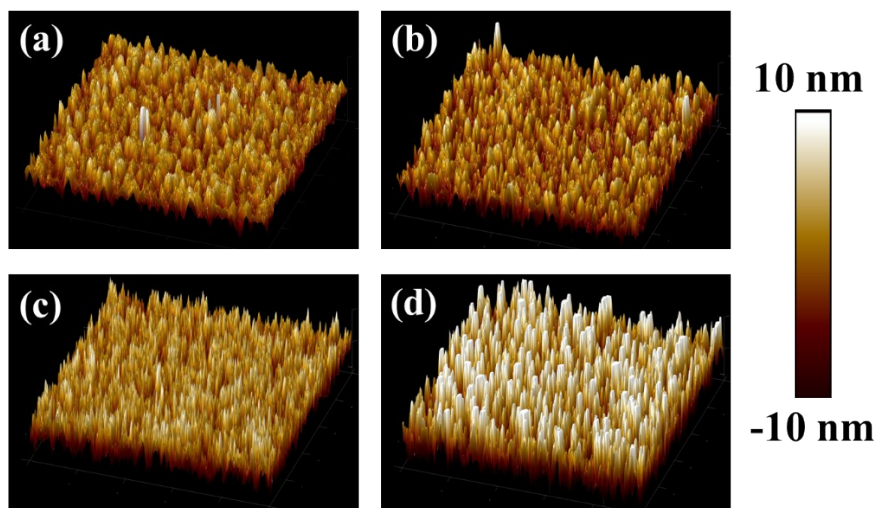

**Figure S1.** The AFM 3D images of various Ga<sub>2</sub>O<sub>3</sub> films deposited on ITO glass with different oxygen pressure. a)10<sup>-4</sup> Pa, b)1 Pa, c)5 Pa, and d)20 Pa.

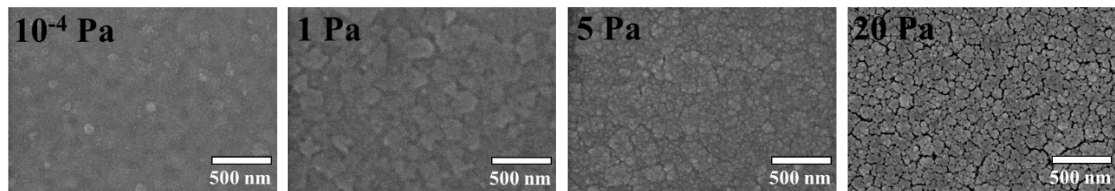

**Figure S2.** Top-view SEM images of  $\text{Ga}_2\text{O}_3$  films deposited at various oxygen pressure.

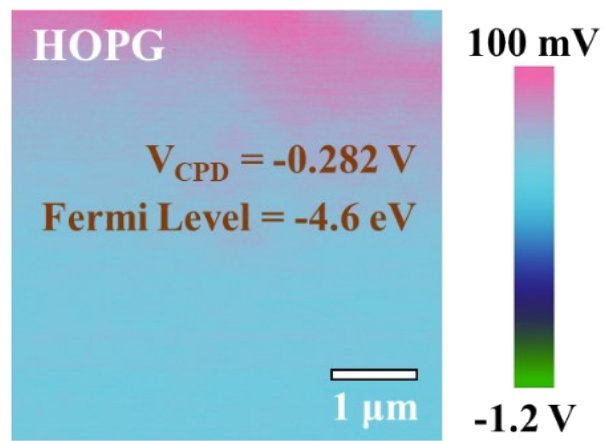

**Figure S3.** KPFM image of a HOPG flake.

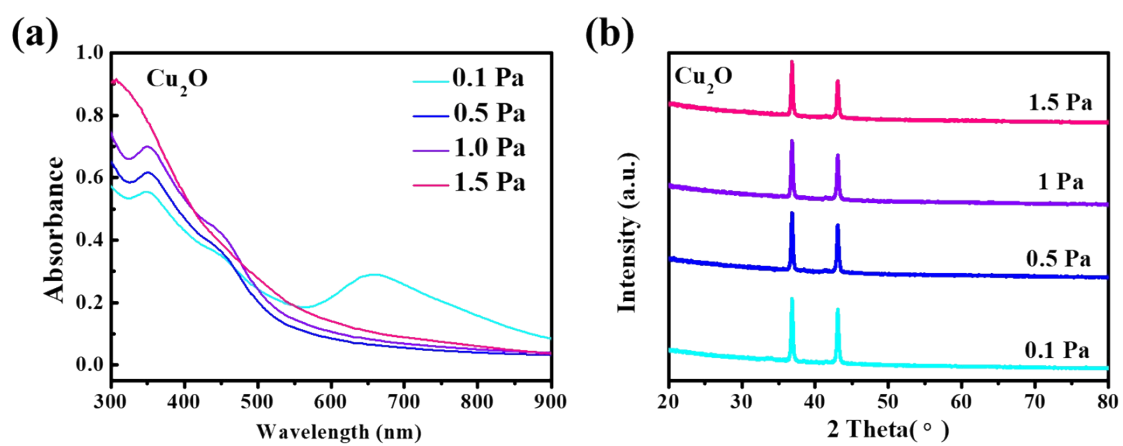

**Figure S4.** a) Absorption spectra b) X-ray diffraction spectra of  $\text{Cu}_2\text{O}$  films deposited at various oxygen pressure.

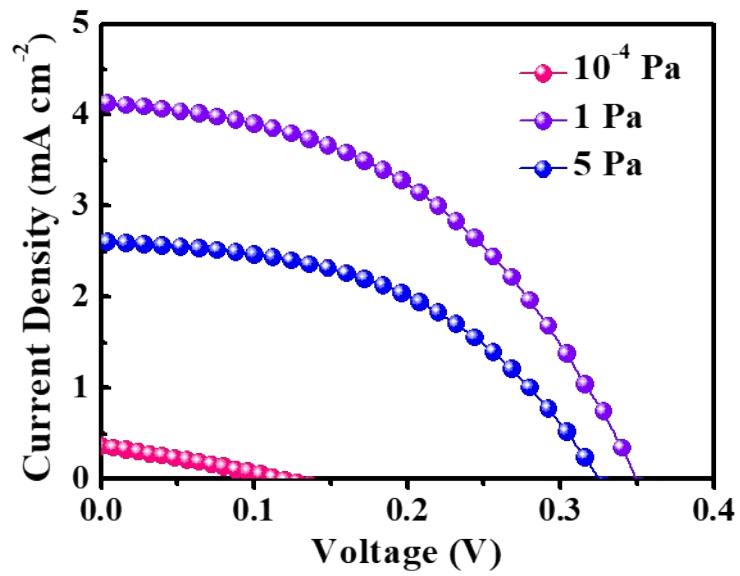

**Figure S5.** Current density-voltage curves measured under an AM 1.5G solar simulator of the photovoltaic device architectures of ITO/Ga<sub>2</sub>O<sub>3</sub>/Cu<sub>2</sub>O/Au using various oxygen pressure prepared Ga<sub>2</sub>O<sub>3</sub>.

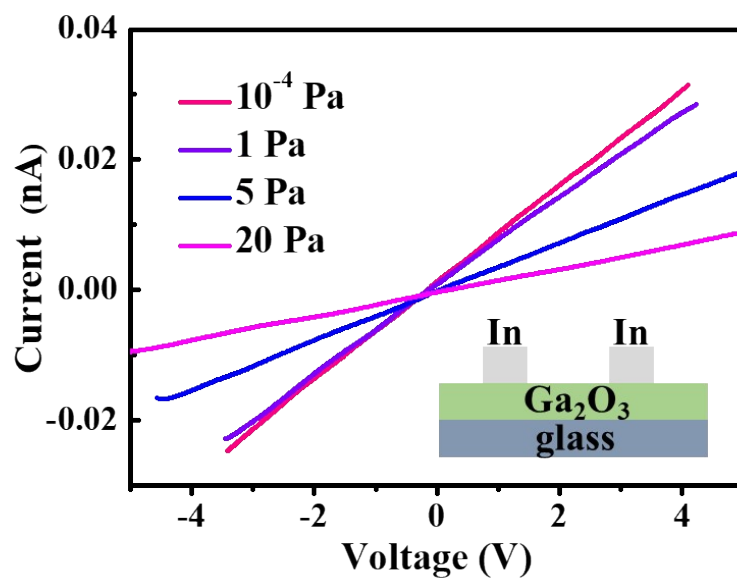

**Figure S6.** Current-voltage characteristics for electrical conductance comparison of devices with a structure of In/Ga<sub>2</sub>O<sub>3</sub>/In using various oxygen pressure prepared Ga<sub>2</sub>O<sub>3</sub>.

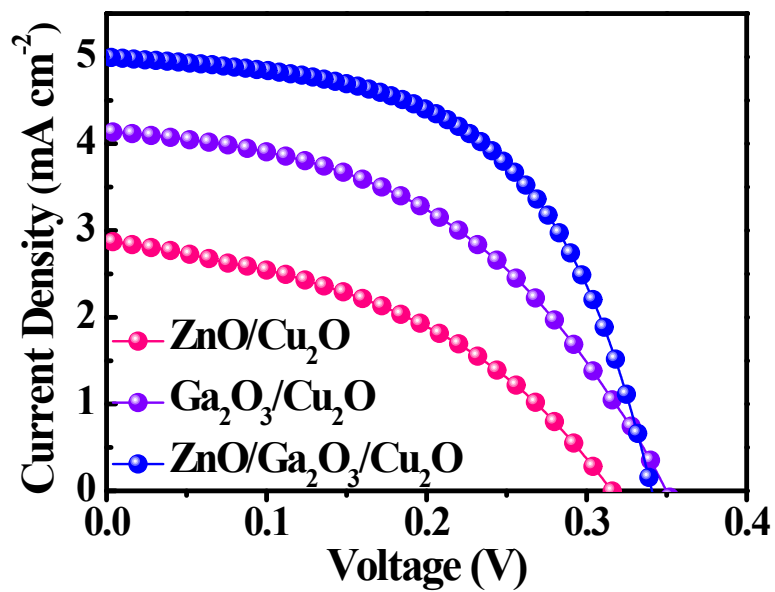

**Figure S7.** Current density-voltage curves measured under an AM 1.5G solar simulator of the various device architectures. (ITO/ZnO/Cu<sub>2</sub>O/Au; ITO/Ga<sub>2</sub>O<sub>3</sub>/Cu<sub>2</sub>O/Au; ITO/ZnO/Ga<sub>2</sub>O<sub>3</sub>/Cu<sub>2</sub>O/Au)



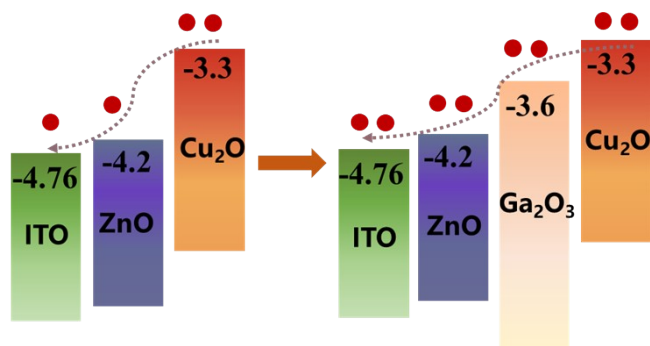

**Figure S8.** The electronic band alignment of the ITO/ZnO/Cu<sub>2</sub>O and ITO/ZnO/Ga<sub>2</sub>O<sub>3</sub>/Cu<sub>2</sub>O heterojunction, showing a stepped arrangement by incorporating PLD Ga<sub>2</sub>O<sub>3</sub>.

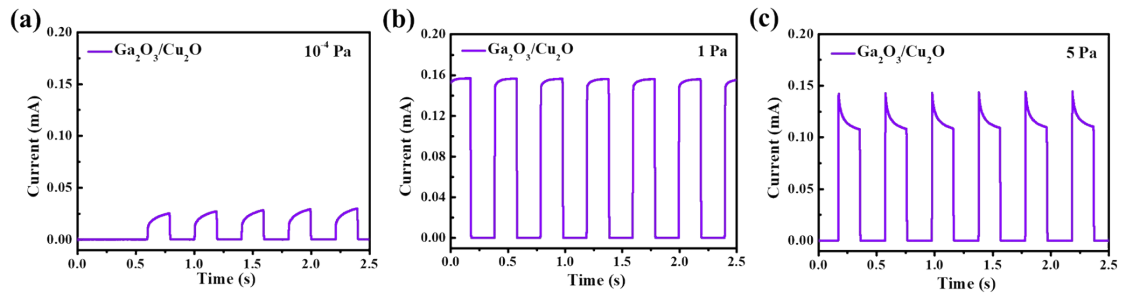

**Figure S9.** a-c) The temporal photoresponse of devices with structure of ITO/Ga<sub>2</sub>O<sub>3</sub>/Cu<sub>2</sub>O/Au at 0 bias voltage, during multiples dark/light cycles of approximately 2.5 s. Ga<sub>2</sub>O<sub>3</sub> films were deposited at different oxygen pressure.

**Table S1. Parameters of the solar cells fabricated with different architectures.**

|                                                         | $J_{sc}$ (mA cm <sup>-2</sup> ) | $V_{oc}$ (V) | FF    | PCE (%) |
|---------------------------------------------------------|---------------------------------|--------------|-------|---------|
| ZnO/ Cu <sub>2</sub> O                                  | 2.88                            | 0.31         | 0.426 | 0.38    |
| Ga <sub>2</sub> O <sub>3</sub> /Cu <sub>2</sub> O       | 4.13                            | 0.35         | 0.456 | 0.66    |
| ZnO /Ga <sub>2</sub> O <sub>3</sub> / Cu <sub>2</sub> O | 4.99                            | 0.34         | 0.554 | 0.94    |

**Table S2. Electrical properties of Cu<sub>2</sub>O prepared on glass at various oxygen pressure.**

| Pressure (Pa) | Hall Mobility (cm <sup>2</sup> V <sup>-1</sup> s <sup>-1</sup> ) | Carrier Density (cm <sup>-3</sup> ) |
|---------------|------------------------------------------------------------------|-------------------------------------|
| 0.1           | 3.84*10 <sup>-1</sup>                                            | 2.31*10 <sup>18</sup>               |
| 0.5           | 4.04*10 <sup>-1</sup>                                            | 8.84*10 <sup>17</sup>               |
| 1             | 1.31*10 <sup>0</sup>                                             | 2.22*10 <sup>16</sup>               |
| 1.5           | 9.57*10 <sup>-1</sup>                                            | 8.52*10 <sup>15</sup>               |
